# Supplementary material for: Structural landscape of the 1 : 1 benzoic acid : isonicotinamide cocrystal
Source: Royal Society of Chemistry journal article supplement (doi:10.1039/c3cc47955b), 2013-11-08
Supplement: c3cc47955b.pdf [file c3cc47955b.pdf]

## Supplementary Information

### Structural Landscape of the Benzoic Acid:Isonicotinamide 1:1 Cocrystal

Ritesh Dubey and Gautam R. Desiraju\*  
Solid State and Structural Chemistry Unit  
Indian Institute of Science, Bangalore 560 012, India

---

**G-1:** Data collection and refinement details, crystallization methods

---

#### FIGURES

---

**R-1:** Diagrams of experimental crystal structures

**R-2:** ORTEP diagrams for the asymmetric unit of the crystal structures (ellipsoids are drawn at 50% probability)

---

#### TABLES

**D-1:** Normalized hydrogen bond distances

**D-2:** Crystallographic tables of the experimental structures

**D-3:** Computational details: unit cell parameters of predicted crystal structures, ESP charge calculation and polymorph prediction protocols for BA:INA cocrystal

---

## G-1: Data collection and refinement details, crystallization methods

---

- Single crystal X-ray diffraction

Single crystal X-ray data for 246TFBA:INA were collected on an Bruker Kappa Apex II CCD diffractometer using Mo-K $\Sigma^1$  ( $\lambda = 0.71073$  Å). The crystal was maintained at the desired temperature during data collection using Oxford cryosystems N<sub>2</sub> open flow cryostat<sup>2</sup>. The remaining crystal data were collected on a Rigaku Mercury 375R/M CCD (XtaLAB mini) diffractometer using graphite monochromated Mo-K $\alpha$  radiation, equipped with a Rigaku low temperature gas spray cooler, data were processed with the Rigaku CrystalClear software<sup>3</sup>. Structure solution and refinement were performed using SHELX-2013<sup>4</sup> embedded in the WinGX suite<sup>5</sup> and Olex2.<sup>6</sup> Refinement of coordinates and anisotropic thermal parameters of non-hydrogen atoms were carried out by the full-matrix least-squares method. The hydrogen atoms for all structures were located on the difference Fourier map. The hydrogen bond tables were created using PLATON.<sup>7</sup> Mercury version 3.0 was used for molecular representations and packing diagrams.<sup>8</sup>

1. Bruker APEX2 (Version 1.0.22), BIS (Version 1.2.08), COSMO (Version 1.48) and SAINT (Version 7.06A), Bruker AXS Inc., Madison, Wisconsin, USA. 2006.
2. Oxford Instruments, Cryojet XL/HT controller; Oxford Diffraction Ltd.: Yarnton, England.
3. CrystalClear 2.0, Rigaku Corporation, Tokyo, Japan.
4. G. M. Sheldrick, *Acta Crystallogr., Sect. A*, 2008, **64**, 112.
5. L. J. Farrugia, *J. Appl. Crystallogr.* 1999, **32**, 837.
6. O.V. Dolomanov, L.J. Bourhis, R.J. Gildea, J.A.K. Howard, H. Puschmann, *J. Appl. Crystallogr.*, 2009, **42**, 339.
7. A. L. Spek, *J. Appl. Crystallogr.*, 2003, **36**, 7.
8. C. F. Macrae, P. R. Edgington, P. McCabe, E. Pidcock, G. P. Shields, R. Taylor, M. Towler, J. van de Streek, *J. Appl. Crystallogr.*, 2006, **39**, 453.

- Crystallization Methods

All compounds were purchased from Sigma-Aldrich and Alfa-Aesar, and were used without further purification.

All crystallization experiments were carried out at ambient conditions. In order to get good quality single crystals for X-ray diffraction, we used several crystallization methods; solvent evaporation, anti-solvent, vapor-diffusion, with various stoichiometric ratios. In the solvent evaporation method, crystals were obtained within three to four days while in the vapor-diffusion method, crystals were obtained after two weeks.

**R-1:**Diagrams of experimental crystal structures

---

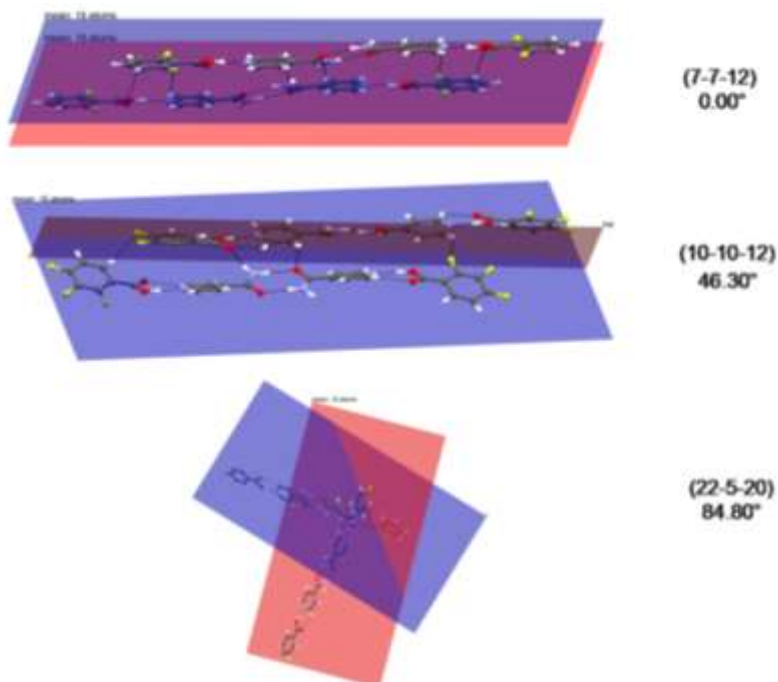

**(a).**Structure types in the 1:1 BA:INA structural landscape. Red and blue color coding refers to molecular planes that contain fluorobenzoic acids. The angles between the planes are indicated.

---

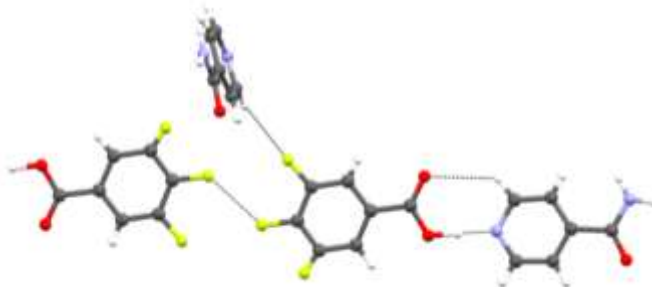

**(b).** Nature of F...F interaction in 34DFBA:INA, the blueprint of 3FBA:INA as well as 4FBA:INA cocrystals

---

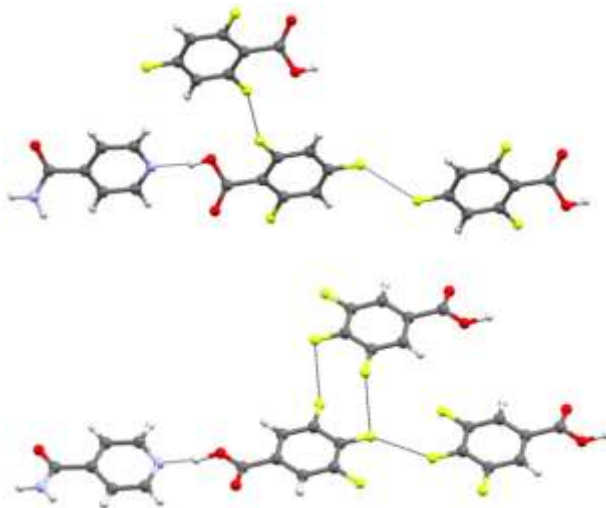

(c).246TFBA:INA (above) and 345TFBA:INA (below) crystal structures.  
These two crystal structures are distinguishable based on the role of the F $\cdots$ F synthons.

---

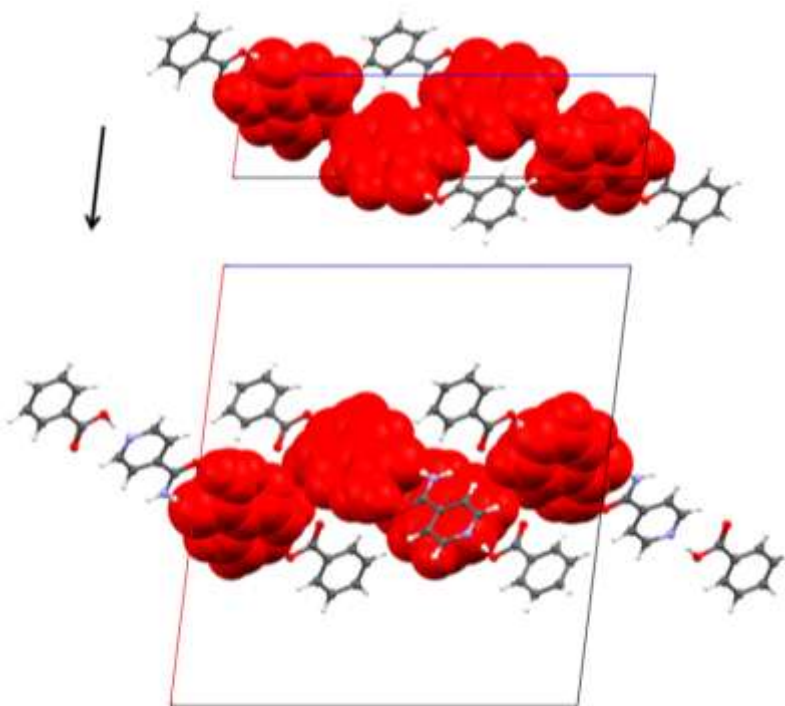

(d).BA (above) and BA:INA (below) crystal structures, *ac* plane.  
Arrow shows the four time extension along a-axis.

---

**R-2:** ORTEP diagrams for the asymmetric unit of the crystal structures (ellipsoids are drawn at 50% probability). Disordered structures are indicated with an asterisk. Only the asymmetric unit is shown.

---

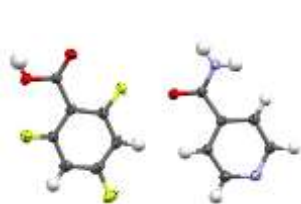

2,4-Difluorobenzoic acid:Isonicotinamide

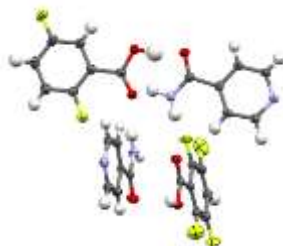

2,5-Difluorobenzoic acid:Isonicotinamide

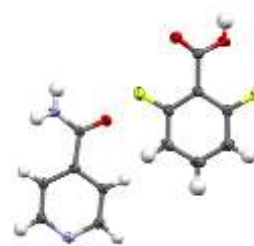

2,6-Difluorobenzoic acid:Isonicotinamide

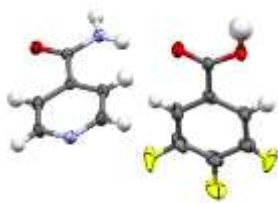

3,4-Difluorobenzoic acid:Isonicotinamide

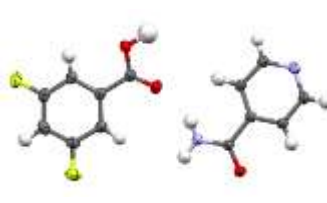

3,5-Difluorobenzoic acid:Isonicotinamide

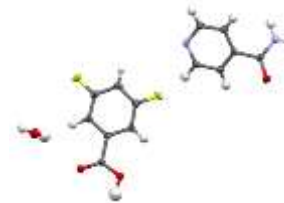

3,5-Difluorobenzoic acid:Isonicotinamide Hydrate

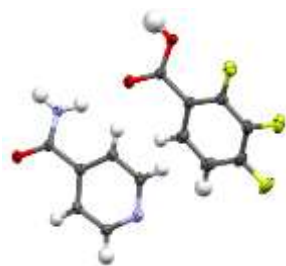

2,3,4-Trifluorobenzoic acid:Isonicotinamide

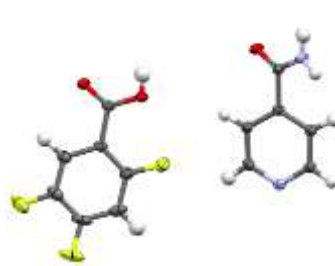

2,4,5-Trifluorobenzoic acid:Isonicotinamide

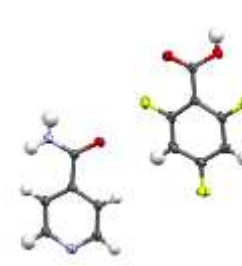

2,4,6-Trifluorobenzoic acid:Isonicotinamide-I

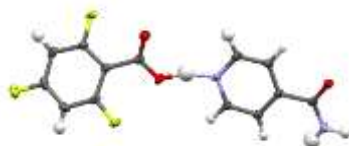

2,4,6-Trifluorobenzoic acid:Isonicotinamide-II

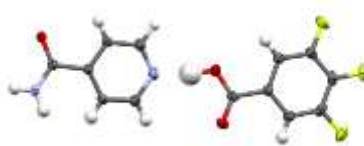

3,4,5-Trifluorobenzoic acid:Isonicotinamide-I

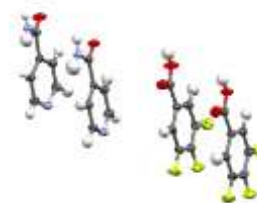

3,4,5-Trifluorobenzoic acid:Isonicotinamide-II

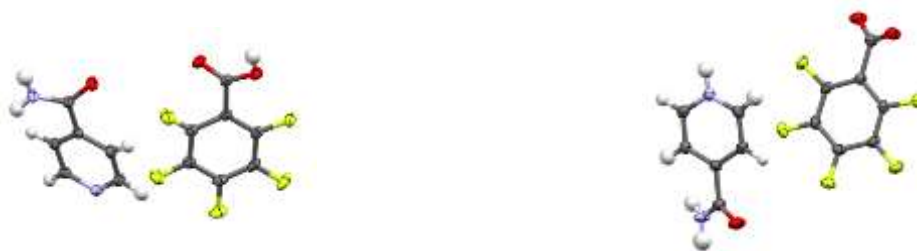

2,3,4,5-Tetrafluorobenzoic acid:Isonicotinamide

2,3,4,5,6-Pentafluorobenzoic acid:Isonicotinamide

**D-1:**Normalized hydrogen bond distances for the compounds in this study

| Compound           | D-H...A <sup>#</sup>       | r(D-H)/Å | r(D-A)/Å   | r(H...A)/Å | ∠D-H...A/°  | Symmetry      |
|--------------------|----------------------------|----------|------------|------------|-------------|---------------|
| 24DFBA:INA         | N(1)-H(1A)...O(1)          | 1.01     | 3.0050(18) | 2.02       | 163         | -x,1-y,1-z    |
|                    | N(1)-H(1B)...F(1)          | 1.01     | 2.8965(18) | 2.51       | 102         | -x,1-y,1-z    |
|                    | N(1)-H(1B)...O(3)          | 1.01     | 2.9116(17) | 1.92       | 167         | -x,1-y,1-z    |
|                    | O(2)-H(2)...N(2)           | 0.98     | 2.5910(17) | 1.62       | 170         | x,1+y,-1+z    |
|                    | C(6)-H(6)...O(1)           | 1.08     | 3.350(2)   | 2.52       | 133         | x,-1+y,z      |
|                    | C(11)-H(11)...O(3)         | 1.08     | 3.4243(19) | 2.47       | 146         | -x,-y,1-z     |
| 25DFBA:INA         | O(1)-H(1)...N(1)           | 0.98     | 2.628(2)   | 1.65       | 176         |               |
|                    | N(2)-H(2A)...O(3)          | 1.01     | 2.942(2)   | 1.93       | 177         | 2-x,1-y,1-z   |
|                    | N(2)-H(2B)...F(3A)         | 1.01     | 3.017(2)   | 2.47       | 113         | 1-x,1-y,1-z   |
|                    | N(2)-H(2B)...O(5)          | 1.01     | 3.078(2)   | 2.08       | 168         | 1-x,1-y,1-z   |
|                    | N(4)-H(4A)...O(6)          | 1.01     | 2.879(2)   | 1.88       | 173         | 1-x,-y,2-z    |
|                    | N(4)-H(4B)...O(2)          | 1.01     | 2.879(2)   | 1.89       | 165         | x,-1+y,z      |
|                    | O(4)-H(4O)...N(3)<br>intra | 0.98     | 2.550(2)   | 1.57       | 175         | -x,1-y,1-z    |
|                    | C(2)-H(2)...F(4A)          | 1.08     | 3.255(3)   | 2.39       | 136         | -1+x,-1+y,z   |
|                    | C(4)-H(4)...F(2)           | 1.08     | 3.453(3)   | 2.37       | 176         | -1-x,1-y,2-z  |
|                    | C(5)-H(5)...O(6)           | 1.08     | 3.348(3)   | 2.29       | 164         | -x,1-y,2-z    |
|                    | C(8)-H(8)...F(3A)          | 1.08     | 3.085(3)   | 2.44       | 117         |               |
|                    | C(8)-H(8)...O(2)           | 1.08     | 3.153(3)   | 2.36       | 128         |               |
|                    | C(11)-H(11)...O(5)         | 1.08     | 3.355(3)   | 2.29       | 168         | 1-x,1-y,1-z   |
|                    | C(12)-H(12)...O(4)         | 1.08     | 3.252(3)   | 2.34       | 140         | x,-1+y,z      |
| C(24)-H(24)...O(2) | 1.08                       | 3.383(3) | 2.34       | 161        | x,-1+y,z    |               |
| C(25)-H(25)...O(3) | 1.08                       | 3.252(3) | 2.45       | 130        | -1+x,-1+y,z |               |
| 26DFBA:INA         | O(1)-H(1)...N(1)           | 0.98     | 2.5650(14) | 1.59       | 170         | x,-1+y,1+z    |
|                    | N(2)-H(2A)...O(3)          | 1.01     | 2.8904(15) | 1.89       | 168         | 1-x,-y,1-z    |
|                    | N(2)-H(2B)...O(2)          | 1.01     | 2.9450(14) | 1.95       | 167         | 1-x,-y,1-z    |
|                    | C(13)-H(13)...F(1)         | 1.08     | 3.0156(16) | 2.26       | 125         | x,y,-1+z      |
| 34DFBA:INA         | O(2)-H(2)...N(1)           | 0.98     | 2.569(2)   | 1.59       | 179         | -x,-1+y,1/2-z |

|                    |                    |      |            |      |     |                  |
|--------------------|--------------------|------|------------|------|-----|------------------|
|                    | N(2)–H(2A)...O(3)  | 1.01 | 2.877(2)   | 1.87 | 173 | -x,1-y,-z        |
|                    | N(2)–H(2B)...O(1)  | 1.01 | 2.945(2)   | 1.95 | 170 | -                |
|                    | C(6)–H(6)...O(1)   | 1.08 | 3.352(3)   | 2.33 | 156 | -                |
| 35DFBA:INA         | O(1)–H(1)...N(1)   | 0.98 | 2.586(4)   | 1.62 | 167 | 1-x,-y,1-z       |
|                    | N(2)–H(2A)...O(2)  | 1.01 | 2.923(5)   | 1.98 | 154 | -                |
|                    | N(2)–H(2B)...O(3)  | 1.01 | 2.860(5)   | 1.85 | 179 | 3-x,1-y,1-z      |
|                    | C(11)–H(11)...F(1) | 1.08 | 3.318(5)   | 2.32 | 153 | x,-1+y,1+z       |
| 35DFBA:INA hydrate | O(2)–H(2)...N(1)   | 0.98 | 2.566(3)   | 1.59 | 173 | 1+x,1-y,1/2+z    |
|                    | N(2)–H(2B)...O(4)  | 1.01 | 2.900(3)   | 1.95 | 157 | x,-1+y,z         |
|                    | N(2)–H(2C)...O(1)  | 1.01 | 2.911(3)   | 2.06 | 141 | x,-1+y,z         |
|                    | O(4)–H(4A)...O(3)  | 0.98 | 2.807(3)   | 1.86 | 160 | -1+x,1-y,-1/2+z  |
|                    | O(4)–H(4B)...O(1)  | 0.98 | 2.967(3)   | 2.01 | 164 | -1+x,y,z         |
|                    | C(2)–H(2A)...O(3)  | 1.08 | 3.302(3)   | 2.35 | 146 | x,-y,-1/2+z      |
|                    | C(4)–H(4)...F(2)   | 1.08 | 3.229(3)   | 2.38 | 134 | -1+x,y,z         |
|                    | C(4)–H(4)...F(1)   | 1.08 | 3.389(3)   | 2.48 | 141 | x,1-y,1/2+z      |
|                    | C(6)–H(6)...O(1)   | 1.08 | 3.219(3)   | 2.38 | 133 | -1+x,1-y,-1/2+z  |
|                    | C(8)–H(8)...O(4)   | 1.08 | 3.465(3)   | 2.46 | 153 | -                |
| 234TFBA:INA        | O(2)–H(2)...N(1)   | 0.98 | 2.6206(16) | 1.64 | 174 | x,3/2-y,-1/2+z   |
|                    | N(2)–H(2A)...O(1)  | 1.01 | 2.8714(17) | 1.89 | 165 | -                |
|                    | N(2)–H(2B)...O(3)  | 1.01 | 2.9415(16) | 1.93 | 176 | 1-x,1-y,-z       |
|                    | C(3)–H(3)...O(3)   | 1.08 | 3.2737(19) | 2.39 | 137 | 1-x,1/2+y,1/2-z  |
|                    | C(5)–H(5)...O(1)   | 1.08 | 3.1148(18) | 2.34 | 127 | x,3/2-y,1/2+z    |
|                    | C(8)–H(8)...F(3)   | 1.08 | 3.164(2)   | 2.46 | 121 | x,3/2-y,-1/2+z   |
| 245TFBA:INA        | O(1)–H(1)...N(1)   | 0.98 | 2.6031(17) | 1.62 | 178 | x,1/2-y,1/2+z    |
|                    | N(2)–H(2A)...O(2)  | 1.01 | 2.8762(19) | 1.88 | 167 | x,-1+y,z         |
|                    | N(2)–H(2B)...O(3)  | 1.01 | 2.9471(18) | 1.94 | 175 | 2-x,-y,2-z       |
|                    | C(4)–H(4)...O(3)   | 1.08 | 3.212(2)   | 2.36 | 135 | 2-x,-1/2+y,3/2-z |
|                    | C(6)–H(6)...O(2)   | 1.08 | 3.1173(19) | 2.35 | 127 | x,1/2-y,-1/2+z   |
|                    | C(9)–H(9)...F(1)   | 1.08 | 3.146(2)   | 2.38 | 126 |                  |
|                    | C(13)–H(13)...F(3) | 1.08 | 3.429(2)   | 2.39 | 160 | 1-x,-1/2+y,1/2-z |
| 246TFBA:INA(I)     | O(2)–H(2)...N(1)   | 0.98 | 2.500(2)   | 1.55 | 162 | 2-x,-y,-z        |
|                    | N(2)–H(2A)...O(3)  | 1.01 | 2.896(2)   | 1.89 | 177 | 1-x,1-y,-z       |
|                    | N(2)–H(2B)...O(2)  | 1.01 | 2.982(2)   | 1.98 | 169 | 1-x,1-y,-z       |
|                    | C(8)–H(8)...F(1)   | 1.08 | 3.150(3)   | 2.32 | 132 | 2-x,1-y,-z       |
|                    | C(9)–H(9)...O(2)   | 1.08 | 3.201(3)   | 2.19 | 154 | 1-x,1-y,-z       |
| 246TFBA:INA(II)    | O(1)–H(1)...N(1)   | 0.98 | 2.500(2)   | 1.55 | 162 | 2-x,-y,-z        |
|                    | N(2)–H(2A)...O(3)  | 1.01 | 2.896(2)   | 1.89 | 177 | 1-x,1-y,-z       |
|                    | N(2)–H(2B)...O(2)  | 1.01 | 2.982(2)   | 1.98 | 169 | 1-x,1-y,-z       |
|                    | C(8)–H(8)...F(1)   | 1.08 | 3.150(3)   | 2.32 | 132 | 2-x,1-y,-z       |
|                    | C(9)–H(9)...O(2)   | 1.08 | 3.201(3)   | 2.19 | 154 | 2-x,1-y,-z       |
| 345TFBA:INA(I)     | O(1)–H(1)...N(1)   | 0.98 | 2.594(3)   | 1.62 | 170 | -                |

|                 |                    |      |            |      |     |                 |
|-----------------|--------------------|------|------------|------|-----|-----------------|
|                 | N(2)–H(2A)...O(2)  | 1.01 | 2.945(3)   | 1.98 | 158 | 1-x,1-y,1-z     |
|                 | N(2)–H(2B)...O(3)  | 1.01 | 2.855(3)   | 1.85 | 174 | -1-x,2-y,1-z    |
|                 | C(10)–H(10)...F(1) | 1.08 | 3.327(3)   | 2.39 | 144 | 1-x,-y,2-z      |
|                 | C(11)–H(11)...F(3) | 1.08 | 3.364(3)   | 2.43 | 144 | -2+x,1+y,z      |
| 345TFBA:INA(II) | O(4)–H(1)...N(3)   | 0.98 | 2.580(5)   | 1.63 | 162 | 1+x,y,z         |
|                 | O(2)–H(2)...N(1)   | 0.98 | 2.586(4)   | 1.63 | 163 | 1+x,y,z         |
|                 | N(4)–H(3)...O(5)   | 1.01 | 2.871(5)   | 1.86 | 176 | -x,-1-y,1-z     |
|                 | N(4)–H(4)...O(1)   | 1.01 | 2.962(5)   | 1.99 | 160 | -x,-y,1-z       |
|                 | N(2)–H(9)...O(6)   | 1.01 | 2.849(5)   | 1.84 | 175 | -x,-1-y,1-z     |
|                 | N(2)–H(10)...O(3)  | 1.01 | 2.930(5)   | 2.14 | 134 | -x,-y,1-z       |
|                 | C(25)–H(8)...F(1)  | 1.08 | 3.283(5)   | 2.45 | 133 | -x,-y,2-z       |
|                 | C(19)–H(14)...F(4) | 1.08 | 3.340(5)   | 2.34 | 153 | -x,-y,2-z       |
| 2345TeFBA:INA   | O(1)–H(1)...N(1)   | 0.98 | 2.5980(17) | 1.62 | 179 | x,-1+y,-1+z     |
|                 | N(2)–H(2A)...O(2)  | 1.01 | 2.8477(19) | 1.86 | 165 | x,3/2-y,1/2+z   |
|                 | N(2)–H(2B)...O(3)  | 1.01 | 2.9643(18) | 1.96 | 176 | -x,2-y,-z       |
|                 | C(8)–H(8)...O(3)   | 1.08 | 3.251(2)   | 2.40 | 135 | -x,1/2+y,1/2-z  |
|                 | C(11)–H(11)...O(2) | 1.08 | 3.0700(19) | 2.26 | 130 | x,1+y,1+z       |
|                 | C(13)–H(13)...F(1) | 1.08 | 3.271(2)   | 2.47 | 130 | x,1/2-y,1/2+z   |
| 23456PFBA:INA   | N(1)–H(1)...O(2)   | 1.01 | 2.602(2)   | 1.60 | 174 | 1-x,1/2+y,1/2-z |
|                 | N(1)–H(1)...O(3)   | 1.01 | 3.192(3)   | 2.58 | 119 | 1-x,1/2+y,1/2-z |
|                 | N(2)–H(2A)...O(1)  | 1.01 | 2.964(3)   | 1.97 | 170 | 2-x,2-y,2-z     |
|                 | N(2)–H(2B)...O(3)  | 1.01 | 2.783(3)   | 1.85 | 152 | 1-x,2-y,1-z     |
|                 | C(6)–H(6)...O(3)   | 1.08 | 3.051(3)   | 2.26 | 128 | 1-x,1/2+y,1/2-z |
|                 | C(13)–H(13)...F(5) | 1.08 | 3.095(3)   | 2.37 | 123 | 1-x,1-y,1-z     |

## D-2: Crystallographic tables of the experimental structures

| Compound                   | 24DFBA:INA                                                                                                   | 25DFBA:INA                                                                                                                   | 26DFBA:INA                                                                                                   | 34DFBA:INA                                                                                                   | 35DFBA:INA                                                                                                   |
|----------------------------|--------------------------------------------------------------------------------------------------------------|------------------------------------------------------------------------------------------------------------------------------|--------------------------------------------------------------------------------------------------------------|--------------------------------------------------------------------------------------------------------------|--------------------------------------------------------------------------------------------------------------|
| CCDC No.                   | 965666                                                                                                       | 965667                                                                                                                       | 965668                                                                                                       | 965671                                                                                                       | 965673                                                                                                       |
| Molecular formula          | C <sub>7</sub> H <sub>3</sub> F <sub>2</sub> O <sub>2</sub> , C <sub>6</sub> H <sub>6</sub> N <sub>2</sub> O | C <sub>14</sub> H <sub>8</sub> F <sub>4</sub> O <sub>4</sub> , C <sub>12</sub> H <sub>12</sub> N <sub>4</sub> O <sub>2</sub> | C <sub>7</sub> H <sub>4</sub> F <sub>2</sub> O <sub>2</sub> , C <sub>6</sub> H <sub>6</sub> N <sub>2</sub> O | C <sub>7</sub> H <sub>3</sub> F <sub>2</sub> O <sub>2</sub> , C <sub>6</sub> H <sub>6</sub> N <sub>2</sub> O | C <sub>7</sub> H <sub>4</sub> F <sub>2</sub> O <sub>2</sub> , C <sub>6</sub> H <sub>6</sub> N <sub>2</sub> O |
| Formula weight             | 279.22                                                                                                       | 1116.89                                                                                                                      | 280.23                                                                                                       | 279.22                                                                                                       | 280.23                                                                                                       |
| Crystal system             | Triclinic                                                                                                    | Triclinic                                                                                                                    | Triclinic                                                                                                    | Monoclinic                                                                                                   | Triclinic                                                                                                    |
| Space group                | <i>P</i> 1                                                                                                   | <i>P</i> 1                                                                                                                   | <i>P</i> 1                                                                                                   | <i>C</i> 2/ <i>c</i>                                                                                         | <i>P</i> 1                                                                                                   |
| <i>a</i> (Å)               | 7.0231(8)                                                                                                    | 8.3252(6)                                                                                                                    | 7.2755(7)                                                                                                    | 22.920(4)                                                                                                    | 6.57(1)                                                                                                      |
| <i>b</i> (Å)               | 7.4789(9)                                                                                                    | 12.1896 (9)                                                                                                                  | 7.6883 (8)                                                                                                   | 5.2259 (8)                                                                                                   | 7.680 (11)                                                                                                   |
| <i>c</i> (Å)               | 12.6456(15)                                                                                                  | 13.477(1)                                                                                                                    | 12.5950(13)                                                                                                  | 20.566(3)                                                                                                    | 13.084(18)                                                                                                   |
| $\alpha$ (°)               | 74.419(5)                                                                                                    | 107.408(8)                                                                                                                   | 73.583(5)                                                                                                    | 90                                                                                                           | 92.357(15)                                                                                                   |
| $\beta$ (°)                | 87.775(6)                                                                                                    | 102.834(7)                                                                                                                   | 84.326(6)                                                                                                    | 97.914(12)                                                                                                   | 90.759(9)                                                                                                    |
| $\gamma$ (°)               | 70.545(5)                                                                                                    | 94.816(7)                                                                                                                    | 66.372(5)                                                                                                    | 90                                                                                                           | 109.87(3)                                                                                                    |
| <i>V</i> (Å <sup>3</sup> ) | 602.33(13)                                                                                                   | 1255.68(18)                                                                                                                  | 619.06(11)                                                                                                   | 2439.9(7)                                                                                                    | 620.1(16)                                                                                                    |



|                                              |         |         |         |         |         |
|----------------------------------------------|---------|---------|---------|---------|---------|
| $\rho_{\text{calc}} \text{ (g/cm}^3\text{)}$ | 1.540   | 1.477   | 1.503   | 1.520   | 1.501   |
| $F(000)$                                     | 286.0   | 572     | 288     | 1144    | 288     |
| $\mu \text{ (mm}^{-1}\text{)}$               | 0.131   | 0.126   | 0.128   | 0.129   | 0.128   |
| $T \text{ (K)}$                              | 150K    | 150K    | 150K    | 150K    | 150K    |
| $\lambda \text{ (Å)}$                        | 0.71073 | 0.71073 | 0.71073 | 0.71073 | 0.71073 |
| <b>Reflns. collected</b>                     | 6013    | 13487   | 6605    | 11631   | 6419    |
| <b>Unique reflns.</b>                        | 2762    | 5746    | 2839    | 2794    | 2808    |
| <b>Completeness (%)</b>                      | 99.7    | 99.8    | 99.8    | 99.8    | 98.7    |
| $R_{\text{int}}$                             | 0.023   | 0.032   | 0.014   | 0.040   | 0.069   |
| $R_1 \text{ (F}^2\text{)}$                   | 0.044   | 0.0501  | 0.0356  | 0.0533  | 0.0440  |
| $wR_2 \text{ (F}^2\text{)}$                  | 0.117   | 0.1395  | 0.1061  | 0.1291  | 0.1353  |
| <b>Goodness-of-fit</b>                       | 1.05    | 1.05    | 1.074   | 1.026   | 1.081   |
| <b>Resolution (2<math>\theta</math>)</b>     | 54      | 54      | 54      | 54      | 54      |

| Compound                                     | 35DFBA:INA hydrate                                                                                                                   | 234TFBA:INA                                                                                                     | 245TFBA:INA                                                                                                     | 246TFBA:INA(I)                                                                                               | 246TFBA:INA (II)                                                                                                             |
|----------------------------------------------|--------------------------------------------------------------------------------------------------------------------------------------|-----------------------------------------------------------------------------------------------------------------|-----------------------------------------------------------------------------------------------------------------|--------------------------------------------------------------------------------------------------------------|------------------------------------------------------------------------------------------------------------------------------|
| <b>CCDC No.</b>                              | 965672                                                                                                                               | 965662                                                                                                          | 965663                                                                                                          | 965664                                                                                                       | 965665                                                                                                                       |
| <b>Molecular formula</b>                     | C <sub>7</sub> H <sub>4</sub> F <sub>2</sub> O <sub>2</sub> ,<br>C <sub>6</sub> H <sub>6</sub> N <sub>2</sub> O,<br>H <sub>2</sub> O | C <sub>7</sub> H <sub>3</sub> F <sub>3</sub> O <sub>2</sub> ,<br>C <sub>6</sub> H <sub>6</sub> N <sub>2</sub> O | C <sub>7</sub> H <sub>3</sub> F <sub>3</sub> O <sub>2</sub> ,<br>C <sub>6</sub> H <sub>6</sub> N <sub>2</sub> O | C <sub>7</sub> H <sub>3</sub> F <sub>3</sub> O <sub>2</sub> , C <sub>6</sub> H <sub>6</sub> N <sub>2</sub> O | C <sub>14</sub> H <sub>6</sub> F <sub>6</sub> O <sub>4</sub> , C <sub>12</sub> H <sub>12</sub> N <sub>4</sub> O <sub>2</sub> |
| <b>Formula weight</b>                        | 298.25                                                                                                                               | 298.22                                                                                                          | 298.22                                                                                                          | 298.22                                                                                                       | 596.44                                                                                                                       |
| <b>Crystal system</b>                        | Monoclinic                                                                                                                           | Monoclinic                                                                                                      | Monoclinic                                                                                                      | Triclinic                                                                                                    | Triclinic                                                                                                                    |
| <b>Space group</b>                           | <i>Pc</i>                                                                                                                            | <i>P2<sub>1</sub>/c</i>                                                                                         | <i>P2<sub>1</sub>/c</i>                                                                                         | <i>P1</i>                                                                                                    | <i>P1</i>                                                                                                                    |
| <b>a (Å)</b>                                 | 3.7357(5)                                                                                                                            | 10.1728(12)                                                                                                     | 10.4383(9)                                                                                                      | 7.2331(14)                                                                                                   | 3.8198(6)                                                                                                                    |
| <b>b (Å)</b>                                 | 15.625 (2)                                                                                                                           | 10.4501(13)                                                                                                     | 10.2939(9)                                                                                                      | 7.7199(15)                                                                                                   | 7.5011(9)                                                                                                                    |
| <b>c (Å)</b>                                 | 10.9260(14)                                                                                                                          | 12.2561(15)                                                                                                     | 12.3077(10)                                                                                                     | 12.597(2)                                                                                                    | 21.814(3)                                                                                                                    |
| <b><math>\alpha</math> (°)</b>               | 90                                                                                                                                   | 90                                                                                                              | 90                                                                                                              | 73.687(5)                                                                                                    | 98.435(8)                                                                                                                    |
| <b><math>\beta</math> (°)</b>                | 93.614(7)                                                                                                                            | 109.116(8)                                                                                                      | 110.475(8)                                                                                                      | 84.340(6)                                                                                                    | 93.169(8)                                                                                                                    |
| <b><math>\gamma</math> (°)</b>               | 90                                                                                                                                   | 90                                                                                                              | 90                                                                                                              | 66.993(5)                                                                                                    | 97.474(7)                                                                                                                    |
| <b>V (Å<sup>3</sup>)</b>                     | 636.49(14)                                                                                                                           | 1231.1(3)                                                                                                       | 1238.93(19)                                                                                                     | 621.3(2)                                                                                                     | 611.25(15)                                                                                                                   |
| $\rho_{\text{calc}} \text{ (g/cm}^3\text{)}$ | 1.556                                                                                                                                | 1.609                                                                                                           | 1.599                                                                                                           | 1.594                                                                                                        | 1.620                                                                                                                        |
| <b>F(000)</b>                                | 308                                                                                                                                  | 608                                                                                                             | 608                                                                                                             | 304                                                                                                          | 304                                                                                                                          |
| $\mu \text{ (mm}^{-1}\text{)}$               | 0.135                                                                                                                                | 0.145                                                                                                           | 0.144                                                                                                           | 0.144                                                                                                        | 0.146                                                                                                                        |
| <b>T (K)</b>                                 | 150K                                                                                                                                 | 150K                                                                                                            | 150K                                                                                                            | 150K                                                                                                         | 100K                                                                                                                         |
| $\lambda \text{ (Å)}$                        | 0.71073                                                                                                                              | 0.71073                                                                                                         | 0.71073                                                                                                         | 0.71073                                                                                                      | 0.71073                                                                                                                      |
| <b>Reflns. collected</b>                     | 6570                                                                                                                                 | 12048                                                                                                           | 12810                                                                                                           | 6167                                                                                                         | 7504                                                                                                                         |
| <b>Unique reflns.</b>                        | 1465                                                                                                                                 | 2808                                                                                                            | 2823                                                                                                            | 2832                                                                                                         | 2662                                                                                                                         |
| <b>Completeness (%)</b>                      | 99.8                                                                                                                                 | 99.9                                                                                                            | 99.9                                                                                                            | 99.3                                                                                                         | 99.8                                                                                                                         |
| $R_{\text{int}}$                             | 0.031                                                                                                                                | 0.026                                                                                                           | 0.038                                                                                                           | 0.034                                                                                                        | 0.039                                                                                                                        |
| $R_1 \text{ (F}^2\text{)}$                   | 0.0307                                                                                                                               | 0.0393                                                                                                          | 0.0424                                                                                                          | 0.0474                                                                                                       | 0.0487                                                                                                                       |
| $wR_2 \text{ (F}^2\text{)}$                  | 0.0752                                                                                                                               | 0.1011                                                                                                          | 0.1066                                                                                                          | 0.1216                                                                                                       | 0.1288                                                                                                                       |
| <b>Goodness-of-fit</b>                       | 1.08                                                                                                                                 | 1.048                                                                                                           | 1.045                                                                                                           | 1.037                                                                                                        | 0.96                                                                                                                         |
| <b>Resolution (2<math>\theta</math>)</b>     | 54                                                                                                                                   | 54                                                                                                              | 54                                                                                                              | 54                                                                                                           | 54                                                                                                                           |

| Compound                                  | 345TFBA:INA(I)                                                                                               | 345TFBA:INA(II)                                                                                              | 2345TeFBA:INA                                                                                                | 23456PFBA:INA                                                                                 |
|-------------------------------------------|--------------------------------------------------------------------------------------------------------------|--------------------------------------------------------------------------------------------------------------|--------------------------------------------------------------------------------------------------------------|-----------------------------------------------------------------------------------------------|
| CCDC No.                                  | 965669                                                                                                       | 965670                                                                                                       | 965661                                                                                                       | 965660                                                                                        |
| Molecular formula                         | C <sub>7</sub> H <sub>3</sub> F <sub>3</sub> O <sub>2</sub> , C <sub>6</sub> H <sub>6</sub> N <sub>2</sub> O | C <sub>7</sub> H <sub>3</sub> F <sub>3</sub> O <sub>2</sub> , C <sub>6</sub> H <sub>6</sub> N <sub>2</sub> O | C <sub>7</sub> H <sub>1</sub> F <sub>4</sub> O <sub>2</sub> , C <sub>6</sub> H <sub>6</sub> N <sub>2</sub> O | C <sub>7</sub> F <sub>5</sub> O <sub>2</sub> , C <sub>6</sub> H <sub>7</sub> N <sub>2</sub> O |
| Formula weight                            | 298.22                                                                                                       | 298.22                                                                                                       | 315.21                                                                                                       | 334.20                                                                                        |
| Crystal system                            | Triclinic                                                                                                    | Triclinic                                                                                                    | Monoclinic                                                                                                   | Monoclinic                                                                                    |
| Space group                               | <i>P</i> 1                                                                                                   | <i>P</i> 1                                                                                                   | <i>P</i> 2 <sub>1</sub> / <i>c</i>                                                                           | <i>P</i> 2 <sub>1</sub> / <i>c</i>                                                            |
| <i>a</i> (Å)                              | 6.8789(12)                                                                                                   | 7.7191(14)                                                                                                   | 10.1699(7)                                                                                                   | 10.421 (4)                                                                                    |
| <i>b</i> (Å)                              | 7.2488 (13)                                                                                                  | 10.869 (2)                                                                                                   | 10.3825(7)                                                                                                   | 10.421(3)                                                                                     |
| <i>c</i> (Å)                              | 13.638(3)                                                                                                    | 15.312(3)                                                                                                    | 12.3583(9)                                                                                                   | 12.704(3)                                                                                     |
| $\alpha$ (°)                              | 89.962(6)                                                                                                    | 73.545(5)                                                                                                    | 90                                                                                                           | 90                                                                                            |
| $\beta$ (°)                               | 81.279(7)                                                                                                    | 86.948(6)                                                                                                    | 108.977(8)                                                                                                   | 114.190(9)                                                                                    |
| $\gamma$ (°)                              | 66.888(8)                                                                                                    | 85.853(6)                                                                                                    | 90                                                                                                           | 90                                                                                            |
| <i>V</i> (Å <sup>3</sup> )                | 616.9(2)                                                                                                     | 1228.1(4)                                                                                                    | 1233.98(16)                                                                                                  | 1258.5(11)                                                                                    |
| $\rho_{\text{calc}}$ (g/cm <sup>3</sup> ) | 1.605                                                                                                        | 1.613                                                                                                        | 1.697                                                                                                        | 1.764                                                                                         |
| <b>F(000)</b>                             | 304                                                                                                          | 608                                                                                                          | 636                                                                                                          | 672                                                                                           |
| $\mu$ . (mm <sup>-1</sup> )               | 0.145                                                                                                        | 0.145                                                                                                        | 0.161                                                                                                        | 0.174                                                                                         |
| <b>T (K)</b>                              | 150K                                                                                                         | 150K                                                                                                         | 150K                                                                                                         | 150K                                                                                          |
| $\lambda$ (Å)                             | 0.71073                                                                                                      | 0.71073                                                                                                      | 0.71073                                                                                                      | 0.71073                                                                                       |
| <b>Refns. collected</b>                   | 6576                                                                                                         | 12973                                                                                                        | 12858                                                                                                        | 11390                                                                                         |
| <b>Unique refns.</b>                      | 2820                                                                                                         | 5593                                                                                                         | 2822                                                                                                         | 2888                                                                                          |
| <b>Completeness (%)</b>                   | 100                                                                                                          | 99.7                                                                                                         | 99.9                                                                                                         | 99.7                                                                                          |
| <b>R<sub>int</sub></b>                    | 0.036                                                                                                        | 0.090                                                                                                        | 0.033                                                                                                        | 0.062                                                                                         |
| <b>R<sub>1</sub> (F<sup>2</sup>)</b>      | 0.0488                                                                                                       | 0.0720                                                                                                       | 0.0400                                                                                                       | 0.0485                                                                                        |
| <b>wR<sub>2</sub>(F<sup>2</sup>)</b>      | 0.1294                                                                                                       | 0.1993                                                                                                       | 0.1062                                                                                                       | 0.1315                                                                                        |
| <b>Goodness-of-fit</b>                    | 1.072                                                                                                        | 0.985                                                                                                        | 1.072                                                                                                        | 1.021                                                                                         |
| <b>Resolution (2<math>\theta</math>)</b>  | 54                                                                                                           | 54                                                                                                           | 54                                                                                                           | 54                                                                                            |

**D-3:**Computational details for ESP charge calculations and Polymorph prediction protocols for 1:1 BA:INA cocrystal

Cell parameters of predicted structures

18<sup>th</sup> Rank  
*C*2/*c*, *v*=2492.87  
*a*=22.0625,  $\alpha$ =90  
*b*=5.3206,  $\beta$ =83.9480  
*c*=21.3556,  $\gamma$ =90

6<sup>th</sup> Rank  
*P*1, *V*=610.767  
*a*=7.8227,  $\alpha$ =77.6135  
*b*=7.0629,  $\beta$ =112.9878  
*c*=13.0459,  $\gamma$ =112.6180

***For ESP charge calculation***

=====  
DMol3 Run Status  
=====

Job Name : 2FBA\_OPT  
Task : Property  
Basis : dnp  
Atom\_Rcut : 3.700 Angstrom  
Functional : pbe  
Harris : off  
Integration Grid : fine  
Occupation : fermi  
Pseudopotential : none  
Property : Plot Data

=====

# Task parameters

Calculate optimize  
Opt\_energy\_convergence 1.0000e-005  
Opt\_gradient\_convergence 2.0000e-003 A  
Opt\_displacement\_convergence 5.0000e-003 A  
Opt\_iterations 50  
Opt\_max\_displacement 0.3000 A  
Initial\_hessian improved  
Symmetry on  
Max\_memory 2048

# Electronic parameters

Spin\_polarization restricted  
Charge 0  
Basis dnp  
Pseudopotential none  
Functional pbe  
Aux\_densityoctupole  
Integration\_grid fine  
Occupation fermi  
Cutoff\_Global 3.7000 angstrom  
Scf\_density\_convergence 1.0000e-006  
Scf\_charge\_mixing 0.2000  
Scf\_iterations 50  
Scf\_diis 6 pulay

# Print options

Print eigval\_last\_it

# Calculated properties

Plot potential  
Mulliken\_analysis charge  
Hirshfeld\_analysis charge  
Esp\_fit on  
Grid msbox 3 0.2500 0.2500 0.2500 3.0000

=====

Summary of ESP fitting calculations

Number of points : 144490  
Total integration weight : 40599.34  
Spacing between : 0.25 Ang  
Sigma : 0.1731E-02  
RMS of V(exact) : 0.1680E-01  
RRMS fit : 10.30 %

ESP-fitted charges :

| nElem |   | chgvdW(in) | vdW(ex) |      |
|-------|---|------------|---------|------|
| 1     | H | 0.166      | 1.30    | 2.80 |
| 2     | O | -0.549     | 1.72    | 3.22 |
| 3     | O | -0.477     | 1.72    | 3.22 |
| 4     | C | 0.143      | 2.00    | 3.50 |
| 5     | C | -0.208     | 2.00    | 3.50 |
| 6     | C | -0.062     | 2.00    | 3.50 |
| 7     | C | -0.163     | 2.00    | 3.50 |
| 8     | C | -0.097     | 2.00    | 3.50 |
| 9     | C | -0.219     | 2.00    | 3.50 |
| 10    | C | 0.478      | 2.00    | 3.50 |
| 11    | H | 0.166      | 1.30    | 2.80 |
| 12    | O | -0.448     | 1.72    | 3.22 |
| 13    | N | -0.632     | 1.83    | 3.33 |
| 14    | N | -0.778     | 1.83    | 3.33 |
| 15    | C | 0.470      | 2.00    | 3.50 |
| 16    | C | -0.558     | 2.00    | 3.50 |
| 17    | C | 0.419      | 2.00    | 3.50 |
| 18    | C | -0.555     | 2.00    | 3.50 |
| 19    | C | 0.437      | 2.00    | 3.50 |
| 20    | C | 0.438      | 2.00    | 3.50 |
| 21    | H | 0.421      | 1.30    | 2.80 |
| 22    | H | 0.136      | 1.30    | 2.80 |
| 23    | H | 0.130      | 1.30    | 2.80 |
| 24    | H | 0.122      | 1.30    | 2.80 |
| 25    | H | 0.396      | 1.30    | 2.80 |
| 26    | H | 0.347      | 1.30    | 2.80 |
| 27    | H | 0.035      | 1.30    | 2.80 |
| 28    | H | 0.198      | 1.30    | 2.80 |
| 29    | H | 0.198      | 1.30    | 2.80 |
| 30    | H | 0.043      | 1.30    | 2.80 |

---

---

***For Polymorph Prediction protocols***

Polymorph

Mode : New calculation  
Protocol : Packing >> Clustering >> Geometry Optimization >>  
Clustering  
Version : 6.0  
Build date : Dec 8 2011  
Host : ritesh  
Operating system : Windows  
Task started : Wed Sep 04 09:33:00 2013

---- Packing parameters ----

Search algorithm : MC Simulated Annealing  
Maximum number of steps : 7000  
Explore torsions : No  
Preoptimize structures : No  
Steps to accept before cooling : 12  
Minimum move factor : 0.1000E-08  
Heating factor : 0.02500  
Maximum temperature : 100000.0 K  
Minimum temperature : 300.0 K

---- Cluster analysis parameters ----

Cluster grouping : Forcefield type  
Cutoff : 7.000  
Number of bins : 140  
Tolerance : 0.1300  
Maximum number of clusters : All clusters

---- Geometry optimization parameters ----

Algorithm : Smart  
Convergence tolerance:  
  Energy : 0.0001 kcal/mol  
  Force : 0.005 kcal/mol/A  
  Stress : 0.005 GPa  
  Displacement : 5e-005 A  
Maximum number of iterations : 500  
External pressure : 0 GPa  
Motion groups rigid : NO  
Optimize cell : YES

---- Energy parameters ----

Forcefield : Dreiding  
Electrostatic terms:  
  Summation method : Ewald  
  Accuracy : 0.0001 kcal/mol  
  Buffer width : 0.5 A

van der Waals terms:  
  Summation method : Ewald  
  Accuracy : 0.0001 kcal/mol  
  Repulsive cutoff : 6 A  
  Buffer width : 0.5 A

Hydrogen bond terms:  
  Summation method : Atom based  
  Truncation method : Cubic spline  
  Cutoff distance : 4.5 A  
  Spline width : 0.5 A  
  Buffer width : 0.5 A

```
#####  
Processing space group : P21/C  
#####
```

---- Packing ----

```
Space group           : P 1 21/C 1  
Random number seed    : 98228021  
Cooling factor        : 0.00100  
Number of trials made : 5933  
Number of trials saved : 3714 (62.6%)  
Maximum temperature achieved : 11454.7 K  
Final temperature     : 299.9 K
```

---- Cluster analysis ----

Lowest energy clusters (20 maximum):

| Cluster | Frame | Cluster size | Energy (kcal/mol/asym. cell) |
|---------|-------|--------------|------------------------------|
| 1       | 3277  | 3            | 2.831                        |
| 2       | 3278  | 2            | 2.846                        |
| 3       | 3227  | 1            | 3.078                        |
| 4       | 3228  | 9            | 3.155                        |
| 5       | 3257  | 5            | 3.302                        |
| 6       | 3273  | 1            | 3.404                        |
| 7       | 3294  | 1            | 3.418                        |
| 8       | 3261  | 6            | 3.474                        |
| 9       | 3292  | 1            | 3.494                        |
| 10      | 3314  | 10           | 3.540                        |
| 11      | 3291  | 1            | 3.575                        |
| 12      | 3289  | 1            | 3.586                        |
| 13      | 3239  | 1            | 3.620                        |
| 14      | 3300  | 2            | 3.633                        |
| 15      | 3285  | 2            | 3.665                        |
| 16      | 3328  | 1            | 3.696                        |
| 17      | 3296  | 2            | 3.709                        |
| 18      | 3226  | 1            | 3.728                        |
| 19      | 3329  | 14           | 3.748                        |
| 20      | 3295  | 1            | 3.773                        |

Calculation summary:

```
Number of frames searched      : 3714  
Number of clusters found      : 3154  
Number of frames put into a cluster : 3714 (100 %).
```

---- Geometry optimization ----

```
Total number of frames      : 3154  
Frames with lowest energy:  
Order   Frame      Energy (kcal/mol/asym. cell)  
1       1217      -69.595  
2        923      -69.595  
3       2183      -69.595
```

|    |      |         |
|----|------|---------|
| 4  | 2147 | -69.595 |
| 5  | 1611 | -69.595 |
| 6  | 1294 | -69.595 |
| 7  | 1485 | -69.595 |
| 8  | 3050 | -69.595 |
| 9  | 325  | -69.595 |
| 10 | 1067 | -69.595 |
| 11 | 1258 | -69.595 |
| 12 | 1682 | -69.592 |
| 13 | 1296 | -69.592 |
| 14 | 1956 | -69.592 |
| 15 | 1814 | -69.585 |
| 16 | 1667 | -69.584 |
| 17 | 293  | -69.255 |
| 18 | 283  | -69.255 |
| 19 | 219  | -69.255 |
| 20 | 189  | -69.255 |

---- Cluster analysis ----

Lowest energy clusters (20 maximum):

| Cluster | Frame | Cluster size | Energy (kcal/mol/asym. cell) |
|---------|-------|--------------|------------------------------|
| 1       | 1217  | 11           | -69.595                      |
| 2       | 1682  | 3            | -69.592                      |
| 3       | 1814  | 1            | -69.585                      |
| 4       | 1667  | 1            | -69.584                      |
| 5       | 293   | 121          | -69.255                      |
| 6       | 647   | 2            | -69.073                      |
| 7       | 2330  | 1            | -69.068                      |
| 8       | 2760  | 3            | -68.943                      |
| 9       | 676   | 4            | -68.909                      |
| 10      | 1782  | 3            | -68.865                      |
| 11      | 2103  | 5            | -68.864                      |
| 12      | 363   | 4            | -68.791                      |
| 13      | 1335  | 3            | -68.780                      |
| 14      | 1787  | 1            | -68.702                      |
| 15      | 673   | 5            | -68.581                      |
| 16      | 1447  | 2            | -68.530                      |
| 17      | 1649  | 9            | -68.514                      |
| 18      | 2955  | 1            | -68.507                      |
| 19      | 2378  | 1            | -68.475                      |
| 20      | 2634  | 1            | -68.377                      |

Calculation summary:

Number of frames searched : 3154  
Number of clusters found : 1697  
Number of frames put into a cluster : 3154 (100 %).

#####  
Processing space group : P-1  
#####

---- Packing ----

Space group : P -1

Random number seed : 207600621  
Cooling factor : 0.00100  
Number of trials made : 4682  
Number of trials saved : 2569 (54.9%)  
Maximum temperature achieved : 3770.6 K  
Final temperature : 300.0 K

---- Cluster analysis ----

Lowest energy clusters (20 maximum):

| Cluster | Frame | Cluster size | Energy (kcal/mol/asym. cell) |
|---------|-------|--------------|------------------------------|
| 1       | 1338  | 1            | 4.028                        |
| 2       | 280   | 1            | 4.057                        |
| 3       | 982   | 1            | 4.903                        |
| 4       | 977   | 1            | 4.920                        |
| 5       | 727   | 1            | 5.042                        |
| 6       | 1000  | 3            | 5.292                        |
| 7       | 1339  | 1            | 5.303                        |
| 8       | 730   | 1            | 5.422                        |
| 9       | 1087  | 1            | 5.583                        |
| 10      | 985   | 2            | 5.602                        |
| 11      | 1335  | 1            | 5.705                        |
| 12      | 2065  | 2            | 5.751                        |
| 13      | 728   | 1            | 5.805                        |
| 14      | 2069  | 8            | 5.821                        |
| 15      | 2168  | 17           | 5.886                        |
| 16      | 989   | 8            | 5.891                        |
| 17      | 1135  | 1            | 5.910                        |
| 18      | 2066  | 1            | 5.955                        |
| 19      | 2164  | 9            | 5.992                        |
| 20      | 1668  | 1            | 6.042                        |

Calculation summary:

Number of frames searched : 2569  
Number of clusters found : 2018  
Number of frames put into a cluster : 2569 (100 %).

---- Geometry optimization ----

Total number of frames : 2018

Frames with lowest energy:

| Order | Frame | Energy (kcal/mol/asym. cell) |
|-------|-------|------------------------------|
| 1     | 165   | -70.584                      |
| 2     | 700   | -70.584                      |
| 3     | 973   | -70.584                      |
| 4     | 703   | -70.584                      |
| 5     | 377   | -70.584                      |
| 6     | 62    | -70.584                      |
| 7     | 483   | -70.584                      |
| 8     | 1712  | -70.584                      |
| 9     | 13    | -70.584                      |
| 10    | 1500  | -70.584                      |



|    |      |         |
|----|------|---------|
| 11 | 1965 | -70.584 |
| 12 | 1928 | -70.584 |
| 13 | 648  | -70.584 |
| 14 | 1280 | -70.584 |
| 15 | 969  | -70.584 |
| 16 | 991  | -70.584 |
| 17 | 771  | -70.584 |
| 18 | 1593 | -70.584 |
| 19 | 1376 | -70.584 |
| 20 | 456  | -70.584 |

---- Cluster analysis ----

Lowest energy clusters (20 maximum):

| Cluster | Frame | Cluster size | Energy (kcal/mol/asym. cell) |
|---------|-------|--------------|------------------------------|
| 1       | 165   | 147          | -70.584                      |
| 2       | 1007  | 2            | -70.581                      |
| 3       | 1247  | 1            | -70.549                      |
| 4       | 1278  | 1            | -70.401                      |
| 5       | 1964  | 1            | -70.160                      |
| 6       | 1788  | 42           | -69.967                      |
| 7       | 895   | 14           | -69.960                      |
| 8       | 1144  | 1            | -69.956                      |
| 9       | 1728  | 1            | -69.842                      |
| 10      | 1977  | 1            | -69.719                      |
| 11      | 1175  | 28           | -69.564                      |
| 12      | 1899  | 1            | -69.553                      |
| 13      | 670   | 34           | -69.141                      |
| 14      | 1590  | 2            | -69.140                      |
| 15      | 1375  | 18           | -69.025                      |
| 16      | 1146  | 17           | -68.817                      |
| 17      | 1463  | 2            | -68.803                      |
| 18      | 1496  | 1            | -68.780                      |
| 19      | 1968  | 1            | -68.742                      |
| 20      | 448   | 2            | -68.479                      |

Calculation summary:

Number of frames searched : 2018  
Number of clusters found : 426  
Number of frames put into a cluster : 2018 (100 %).

#####  
Processing space group : C2/C  
#####

---- Packing ----

Space group : C 1 2/C 1  
Random number seed : 240380207  
Cooling factor : 0.00100  
Number of trials made : 7000  
Number of trials saved : 3578 (51.1%)  
Maximum temperature achieved : 21767.2 K  
Final temperature : 660.8 K

---- Cluster analysis ----

Lowest energy clusters (20 maximum):

| Cluster | Frame | Cluster size | Energy (kcal/mol/asym. cell) |
|---------|-------|--------------|------------------------------|
| 1       | 94    | 1            | 7.237                        |
| 2       | 240   | 1            | 7.556                        |
| 3       | 9     | 1            | 8.300                        |
| 4       | 5     | 1            | 8.640                        |
| 5       | 6     | 1            | 8.660                        |
| 6       | 374   | 1            | 8.681                        |
| 7       | 46    | 1            | 8.742                        |
| 8       | 292   | 1            | 8.867                        |
| 9       | 406   | 1            | 8.948                        |
| 10      | 49    | 1            | 9.157                        |
| 11      | 210   | 1            | 9.252                        |
| 12      | 174   | 1            | 9.349                        |
| 13      | 215   | 1            | 9.482                        |
| 14      | 232   | 1            | 9.518                        |
| 15      | 179   | 1            | 9.592                        |
| 16      | 111   | 1            | 9.623                        |
| 17      | 137   | 1            | 9.714                        |
| 18      | 217   | 1            | 9.793                        |
| 19      | 11    | 1            | 9.807                        |
| 20      | 199   | 1            | 9.938                        |

Calculation summary:

Number of frames searched : 3578  
Number of clusters found : 587  
Number of frames put into a cluster : 3578 (100 %).

---- Geometry optimization ----

Total number of frames : 587

Frames with lowest energy:

| Order | Frame | Energy (kcal/mol/asym. cell) |
|-------|-------|------------------------------|
| 1     | 200   | -69.915                      |
| 2     | 287   | -69.095                      |
| 3     | 148   | -68.900                      |
| 4     | 367   | -68.859                      |
| 5     | 227   | -68.825                      |
| 6     | 387   | -68.763                      |
| 7     | 454   | -68.468                      |
| 8     | 19    | -68.468                      |
| 9     | 175   | -68.315                      |
| 10    | 352   | -68.166                      |
| 11    | 1     | -68.094                      |
| 12    | 28    | -68.071                      |
| 13    | 476   | -67.988                      |
| 14    | 486   | -67.625                      |
| 15    | 51    | -67.585                      |
| 16    | 396   | -67.582                      |
| 17    | 16    | -67.552                      |
| 18    | 72    | -67.552                      |

|    |     |         |
|----|-----|---------|
| 19 | 554 | -67.337 |
| 20 | 302 | -67.337 |

---- Cluster analysis ----

Lowest energy clusters (20 maximum):

| Cluster | Frame | Cluster size | Energy (kcal/mol/asym. cell) |
|---------|-------|--------------|------------------------------|
| 1       | 200   | 1            | -69.915                      |
| 2       | 287   | 1            | -69.095                      |
| 3       | 148   | 1            | -68.900                      |
| 4       | 367   | 1            | -68.859                      |
| 5       | 227   | 1            | -68.825                      |
| 6       | 387   | 1            | -68.763                      |
| 7       | 454   | 2            | -68.468                      |
| 8       | 175   | 1            | -68.315                      |
| 9       | 352   | 1            | -68.166                      |
| 10      | 1     | 1            | -68.094                      |
| 11      | 28    | 1            | -68.071                      |
| 12      | 476   | 1            | -67.988                      |
| 13      | 486   | 1            | -67.625                      |
| 14      | 51    | 1            | -67.585                      |
| 15      | 396   | 1            | -67.582                      |
| 16      | 16    | 2            | -67.552                      |
| 17      | 554   | 2            | -67.337                      |
| 18      | 330   | 4            | -67.240                      |
| 19      | 354   | 1            | -67.139                      |
| 20      | 566   | 1            | -67.109                      |

Calculation summary:

Number of frames searched : 587  
Number of clusters found : 470  
Number of frames put into a cluster : 587 (100 %).

Task terminated : Wed Sep 04 17:27:41 2013  
Total CPU time used : 7:49:17 hours

Termination status : Normal
